# Supplementary material for: Galvanic replacement-induced preparation of bloom-like Pt23Ni77 for methanol coupled efficient hydrogen production
Source: Royal Society of Chemistry journal article supplement (doi:10.1039/d3nr06359c), 2024-01-01
Supplement: d3nr06359c1.pdf [file d3nr06359c1.pdf]

## *Supporting Information*

Galvanic Replacement-Induced the preparation of bloom-like Pt<sub>23</sub>Ni<sub>77</sub> for  
methanol coupled efficient hydrogen production

Jin Zhao, Jinjin Wang, Ying Wang, Junming Zhang, Ergui Luo, Baoliang Lv, Tianjun  
Hu<sup>\*</sup>, Jianfeng Jia<sup>\*</sup>

Key Laboratory of Magnetic Molecules and Magnetic Information Materials of  
Ministry of Education & School of Chemistry and Materials Science of Shanxi  
Normal University, Taiyuan 030032, China

---

<sup>\*</sup>Corresponding authors.

E-mail: [hutj@sxnu.edu.cn](mailto:hutj@sxnu.edu.cn) (T.-J Hu), [jjajf@dns.sxnu.edu.cn](mailto:jjajf@dns.sxnu.edu.cn) (J.-F Jia)

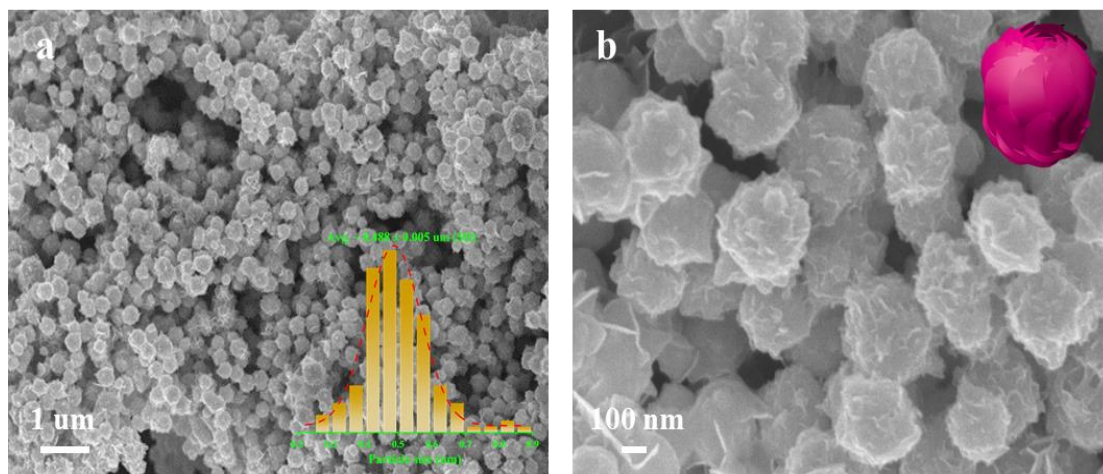

**Fig. S1** The SEM images. a, b) Ni NPs.

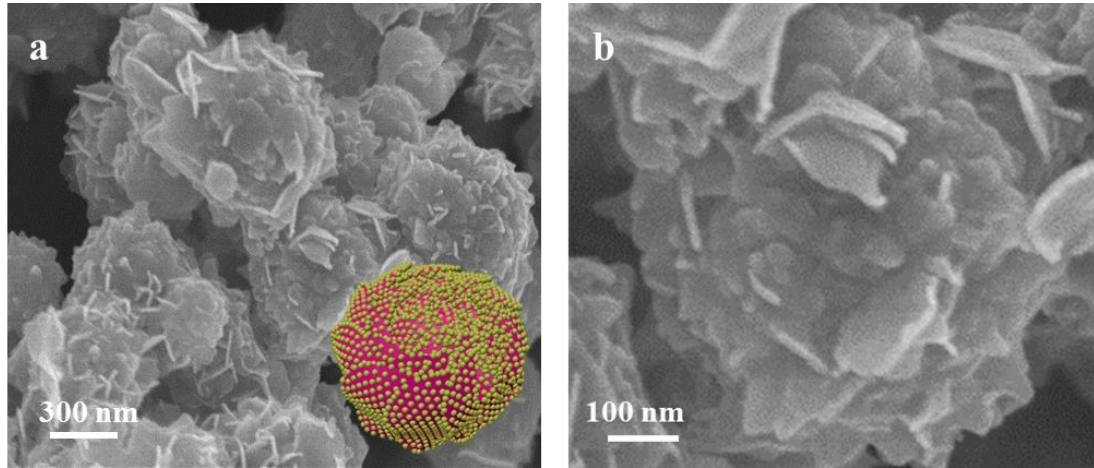

**Fig. S2** The SEM images. a, b) Pt<sub>12</sub>Ni<sub>88</sub>.

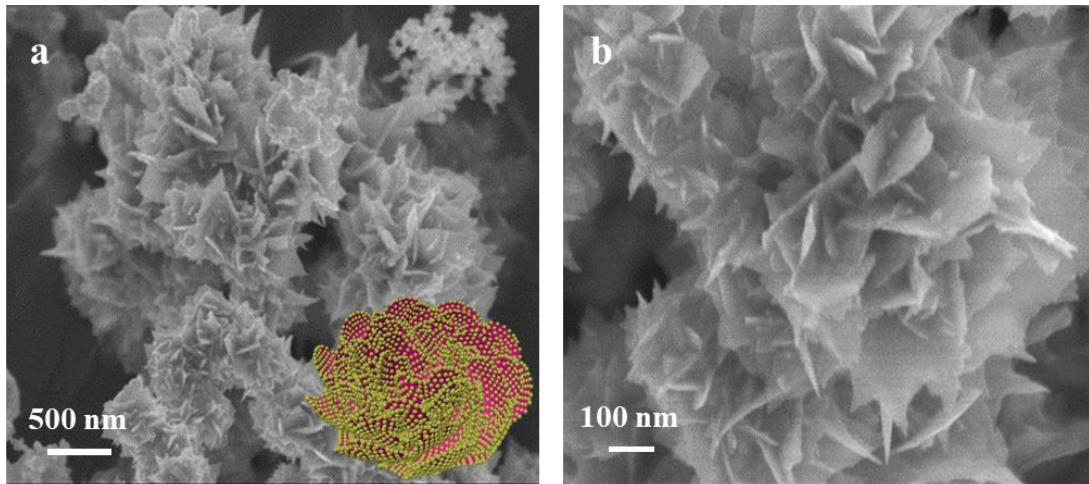

*Fig. S3* The SEM images. a, b) Pt<sub>23</sub>Ni<sub>77</sub>.

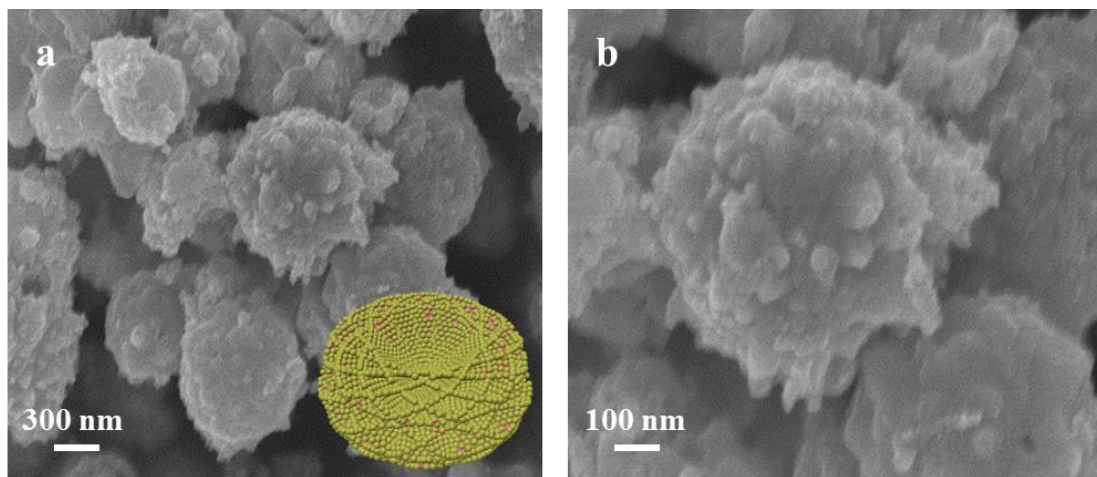

**Fig. S4** The SEM images. a, b)  $\text{Pt}_{42}\text{Ni}_{58}$ .

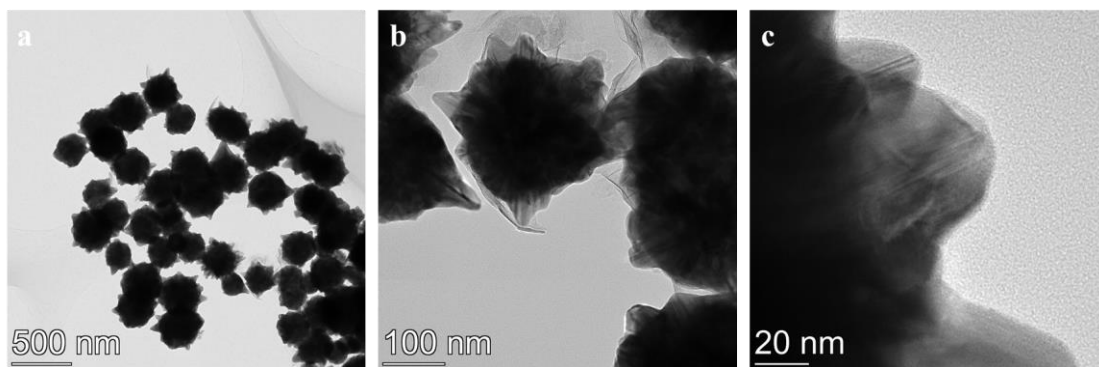

**Fig. S5** (a-c) Low-magnification TEM images for Ni.

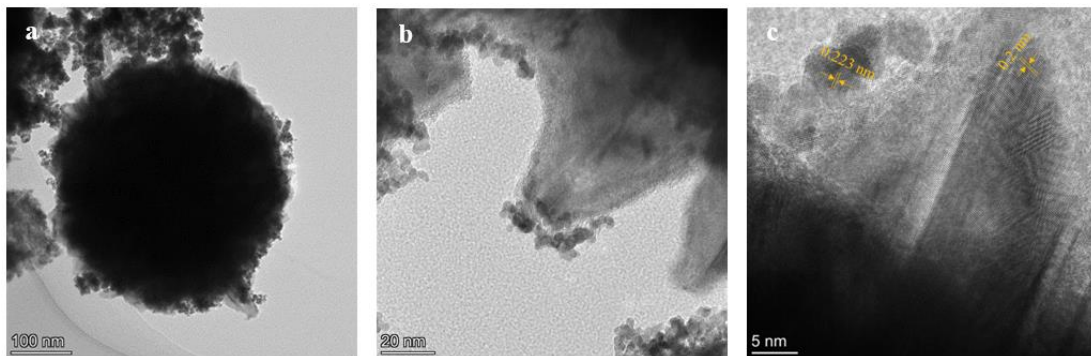

**Fig. S6** (a-c) Low-magnification TEM images for Pt<sub>12</sub>Ni<sub>88</sub>.

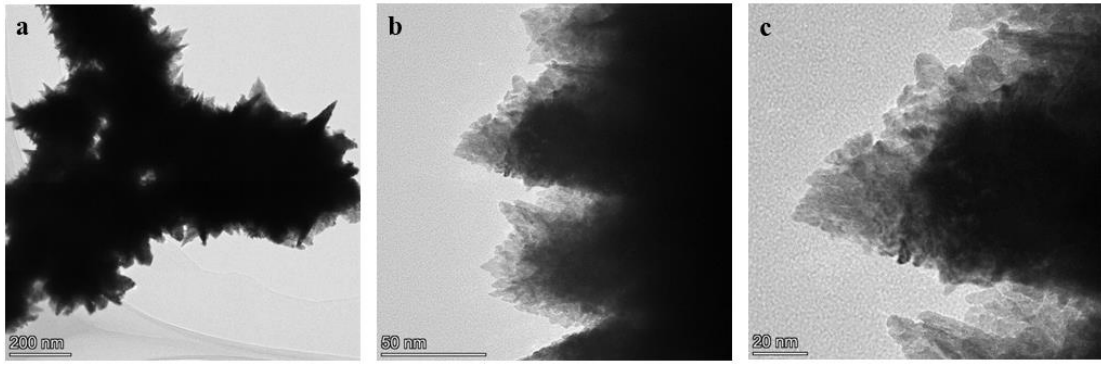

**Fig. S7** (a-c) Low-magnification TEM images for Pt<sub>23</sub>Ni<sub>77</sub>.



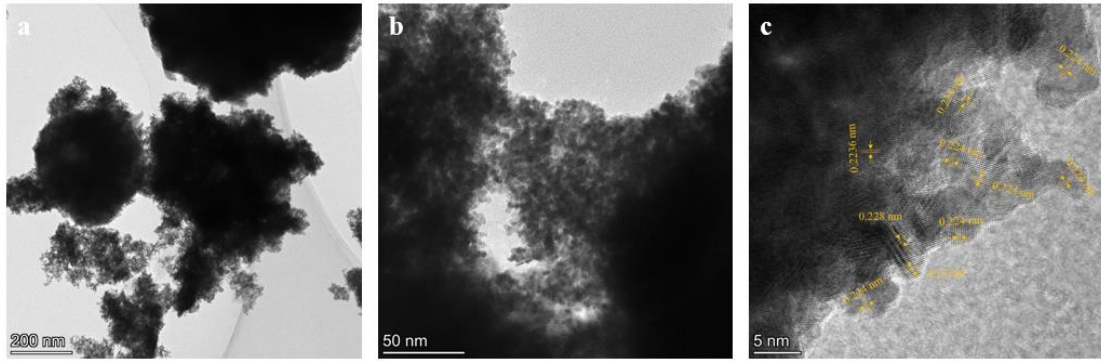

**Fig. S8** (a-c) Low-magnification TEM images for Pt<sub>42</sub>Ni<sub>58</sub>.

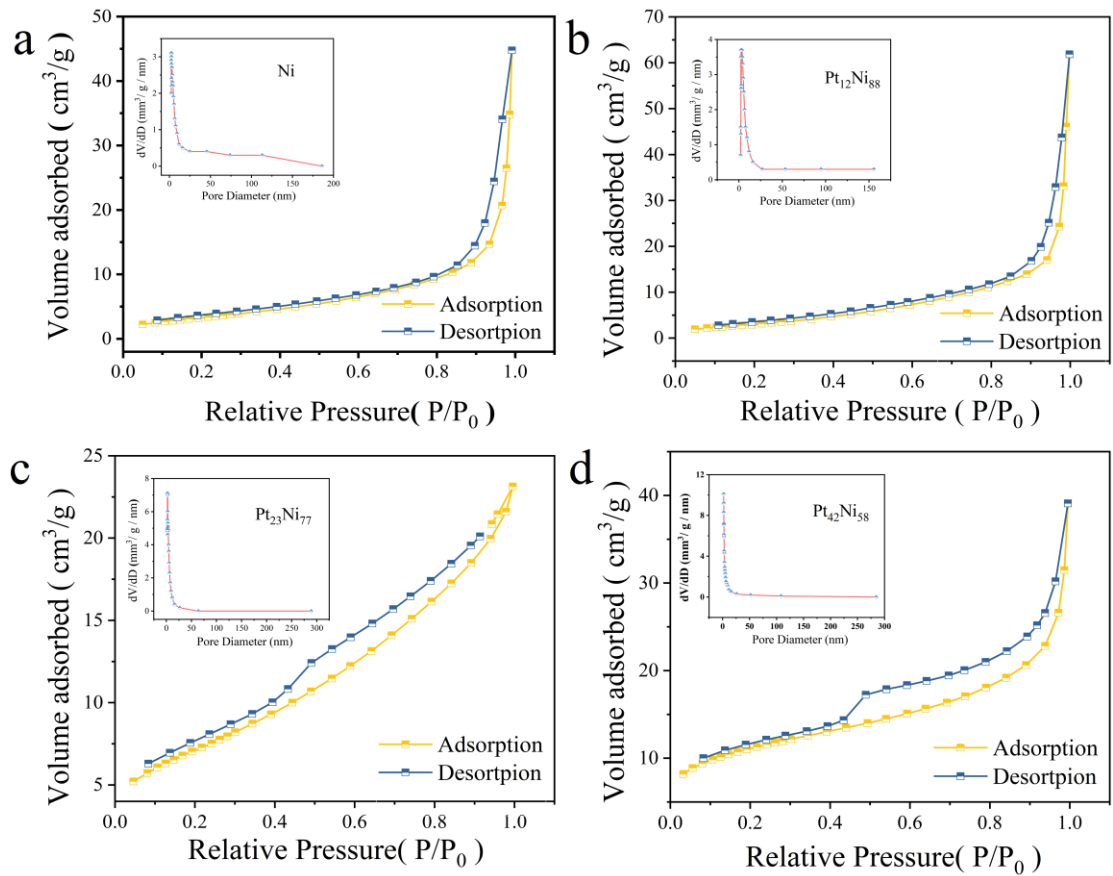

**Fig. S9**  $N_2$  adsorption/desorption isotherms and pore size distribution of the (a) Ni, (b)  $Pt_{12}Ni_{88}$ , (c)  $Pt_{23}Ni_{77}$ , and (d)  $Pt_{42}Ni_{58}$ .

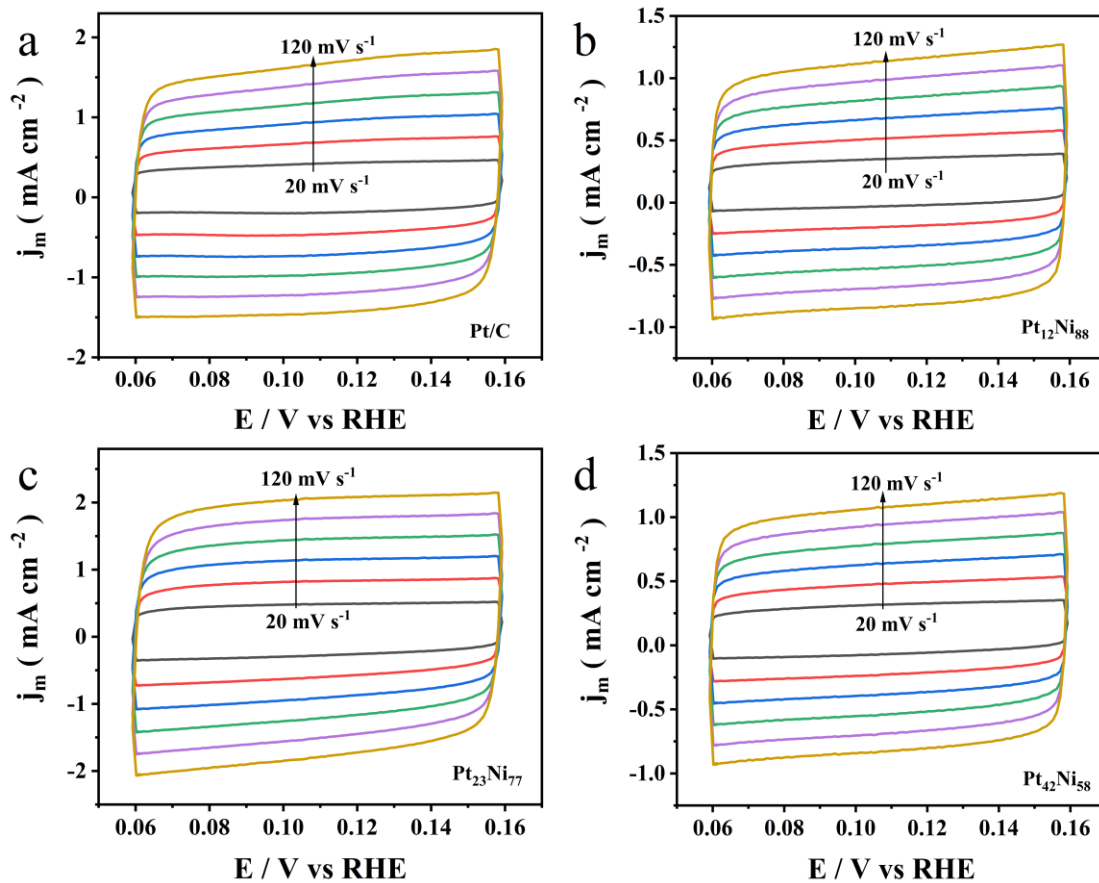

**Fig. S10** The CV curves obtained at different scan rates (20-120  $\text{mV s}^{-1}$ ) a) Pt/C, b)  $\text{Pt}_{12}\text{Ni}_{88}$ , c)  $\text{Pt}_{23}\text{Ni}_{77}$ , and d)  $\text{Pt}_{42}\text{Ni}_{58}$  in 0.5 M  $\text{H}_2\text{SO}_4$ .

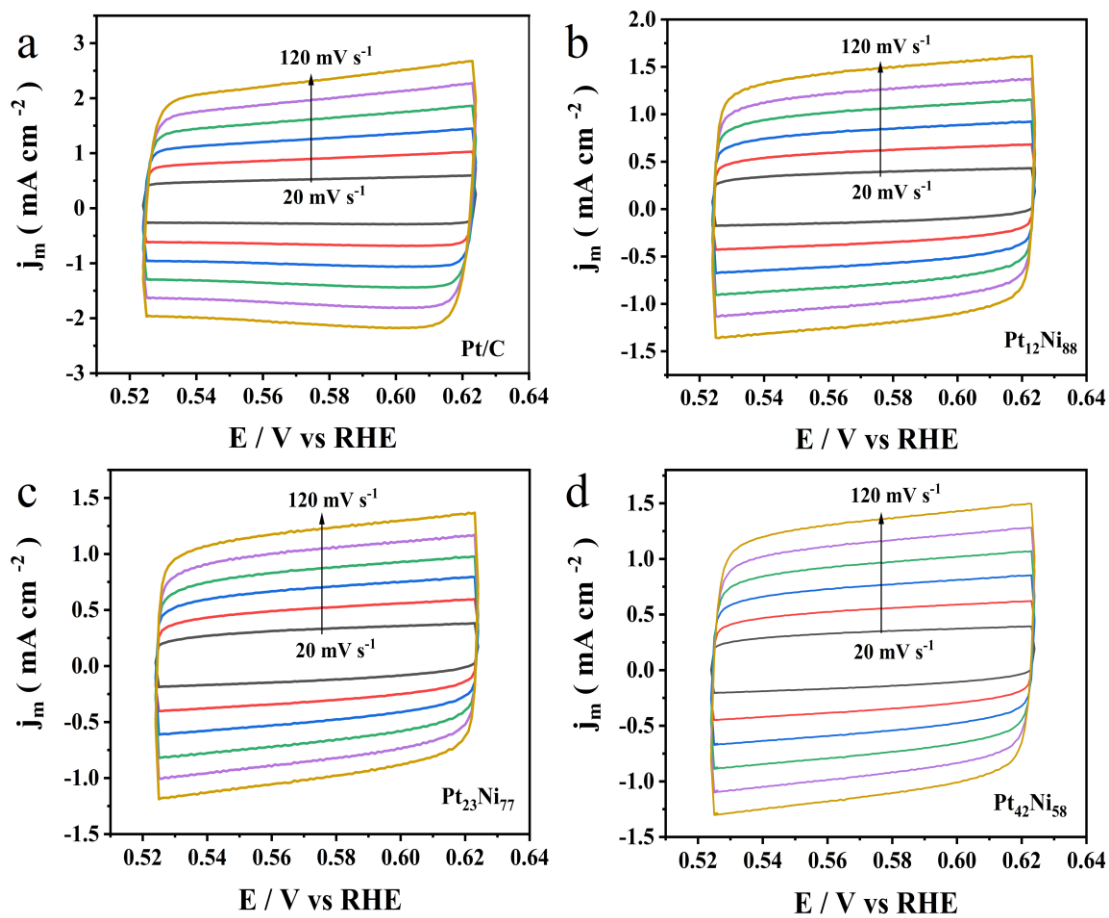

**Fig. S11** The CV curves obtained at different scan rates (20-120  $\text{mV s}^{-1}$ ) a) Pt/C, b)  $\text{Pt}_{12}\text{Ni}_{88}$ , c)  $\text{Pt}_{23}\text{Ni}_{77}$ , and d)  $\text{Pt}_{42}\text{Ni}_{58}$  in 1.0 M KOH.

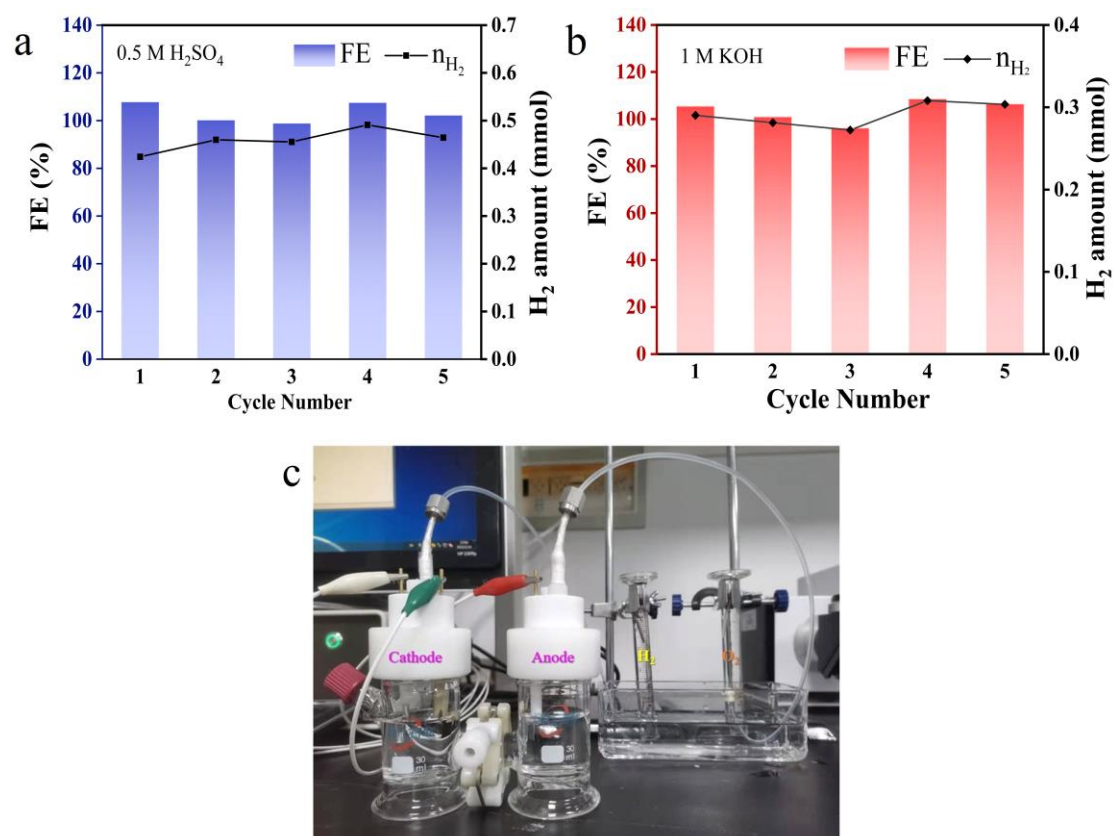

**Fig. S12** Amount of H<sub>2</sub> and FEs during recycling tests for 5 cycles with an overpotential of 100 mV and 10 min in (a) 0.5 M H<sub>2</sub>SO<sub>4</sub> and (b) 1.0 M KOH. (c) Diagram of the device for collecting hydrogen and oxygen using the drainage gas collection method.

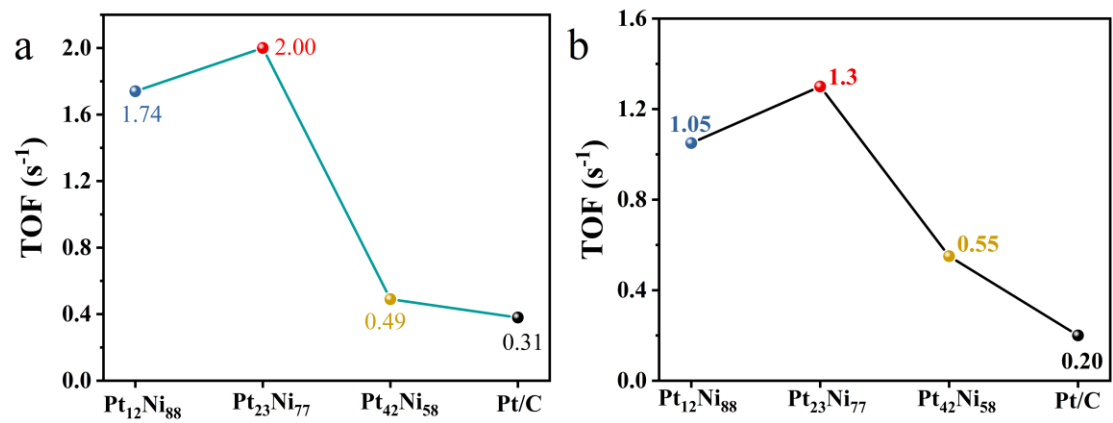

**Fig. S13** (a) Comparison of potential-dependent TOF at -0.05 V vs. RHE in 0.5M H<sub>2</sub>SO<sub>4</sub>. (b) Comparison of potential-dependent TOF at -0.07 V vs. RHE in 1.0 M KOH.

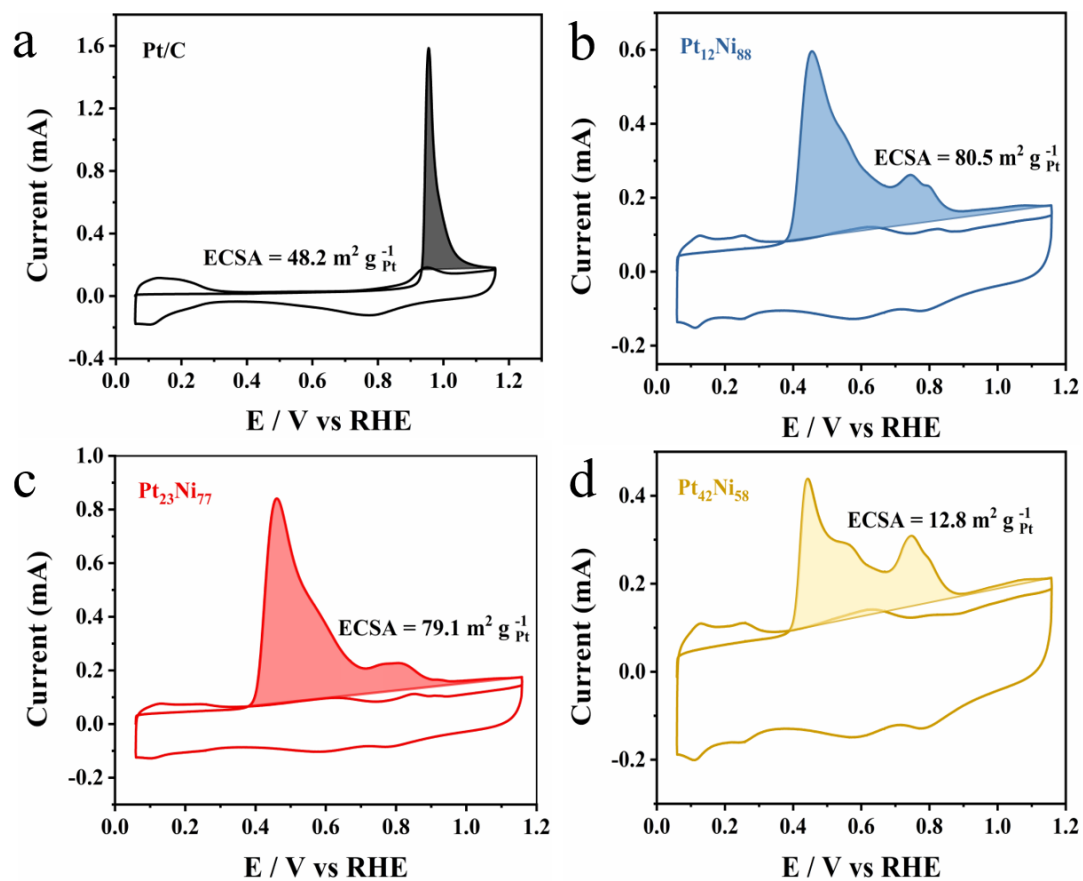

**Fig. S14** CO stripping that quantifies the surface area of catalysts at  $50 \text{ mV s}^{-1}$  in  $\text{N}_2$ -saturated  $0.5 \text{ M H}_2\text{SO}_4$ .

**Table S1.** ICP-MS analysis of catalysts.

| <b>Catalyst</b>                   | <b>Pt loading (wt. %)</b> | <b>Ni loading (wt. %)</b> | <b>Molar ratio of Pt : Ni</b> |
|-----------------------------------|---------------------------|---------------------------|-------------------------------|
| Pt <sub>12</sub> Ni <sub>88</sub> | 12                        | 88                        | 0.03941                       |
| Pt <sub>23</sub> Ni <sub>77</sub> | 23                        | 77                        | 0.09184                       |
| Pt <sub>42</sub> Ni <sub>58</sub> | 42                        | 58                        | 0.22180                       |



**Table S2.** Porosity Parameters of the Ni, Pt<sub>12</sub>Ni<sub>88</sub>, Pt<sub>23</sub>Ni<sub>77</sub>, and Pt<sub>42</sub>Ni<sub>58</sub> catalysts.

| <b>Sample</b>                  | <b>Ni</b> | <b>Pt<sub>12</sub>Ni<sub>88</sub></b> | <b>Pt<sub>23</sub>Ni<sub>77</sub></b> | <b>Pt<sub>42</sub>Ni<sub>58</sub></b> |
|--------------------------------|-----------|---------------------------------------|---------------------------------------|---------------------------------------|
| S <sub>BET</sub> <sup>a</sup>  | 17.6104   | 21.4322                               | 27.8802                               | 26.4335                               |
| D <sub>pore</sub> <sup>b</sup> | 16.6038   | 18.9621                               | 5.4376                                | 8.4741                                |
| V <sub>pore</sub> <sup>c</sup> | 0.0731    | 0.1016                                | 0.0379                                | 0.0560                                |

<sup>a</sup> BET surface areas (m<sup>2</sup>/g). <sup>b</sup> Average pore size (nm). <sup>c</sup> Single-point adsorption total pore volume of pores (cm<sup>3</sup>/g).

**Table S3.** Summary of the HER Properties of Pt<sub>23</sub>Ni<sub>77</sub> and other representative catalysts in literature at 1.0 M KOH.

| <b>Catalysts</b>                       | <b>Overpotential<br/>(mV vs. RHE)<br/>at 10 mA cm<sup>-2</sup></b> | <b>Ref.</b> |
|----------------------------------------|--------------------------------------------------------------------|-------------|
| Pt <sub>23</sub> Ni <sub>77</sub>      | 32                                                                 | This work   |
| Pt <sub>1</sub> /N-C                   | 46                                                                 | 1           |
| Pt/NiRu-OH                             | 38                                                                 | 2           |
| Pt-Ni NWs/NiO <sub>x</sub>             | 40                                                                 | 3           |
| Pt <sub>3</sub> Ni <sub>2</sub> -NWs-S | 42                                                                 | 4           |
| A-CoPt-NC                              | 50                                                                 | 5           |
| Pt-Ni-O                                | 40                                                                 | 6           |
| RhPd-H                                 | 40                                                                 | 7           |
| Pt/MOF-O                               | 66                                                                 | 8           |
| Pt/np-Co <sub>0.85</sub> Se            | 58                                                                 | 9           |
| Pt-Co(OH) <sub>2</sub> /C              | 32                                                                 | 10          |
| RuTeP                                  | 35                                                                 | 11          |
| Ru <sub>1</sub> Ni <sub>1</sub> -NCNFs | 35                                                                 | 12          |
| Pd <sub>3</sub> Ru/C                   | 42                                                                 | 13          |
| Pt <sub>3.6</sub> Ni-S NWs             | 38                                                                 | 14          |
| Pt/MgO                                 | 39                                                                 | 15          |

**Table S4.** Summary of the HER Properties of Pt<sub>23</sub>Ni<sub>77</sub> and other representative catalysts in literature at 0.5 M H<sub>2</sub>SO<sub>4</sub>.

| Catalysts                                | Overpotential<br>(mV vs. RHE)<br>at 10 mA cm <sup>-2</sup> | Ref.      |
|------------------------------------------|------------------------------------------------------------|-----------|
| Pt <sub>23</sub> Ni <sub>77</sub>        | 21.2                                                       | This work |
| Pt <sub>1</sub> Ru <sub>1</sub> /NMHCS-A | 22                                                         | 16        |
| Pt-SAs/WS <sub>2</sub>                   | 32                                                         | 17        |
| 1% PtW <sub>6</sub> O <sub>24</sub> /C   | 22                                                         | 18        |
| Pt <sub>1</sub> /OLC                     | 38                                                         | 19        |
| PtN <sub>x</sub> /TiO <sub>2</sub>       | 67                                                         | 20        |
| Pt/MOF-O                                 | 28                                                         | 8         |
| PtTe <sub>2</sub> NSs                    | ~40                                                        | 21        |
| PtRu/RFCs                                | 46.6                                                       | 22        |
| Pt/C-40%                                 | 45                                                         | 23        |
| Pt <sub>3</sub> Ni <sub>4</sub> NWs/C    | 40                                                         | 4         |
| Pt@NHPCP                                 | 56                                                         | 24        |
| Pt@MTO-S                                 | 73                                                         | 25        |
| ALD50 Pt/NGNs                            | 39                                                         | 26        |
| PtSi                                     | 22                                                         | 27        |

**Table S5.** Comparison of the MOR activity of different Pt electrocatalysts in acid solution.

| Catalysts                                    | Electrolytes                                          | Onset potential (V vs. RHE) | Mass activity (mA mg <sup>-1</sup> ) | Ref.      |
|----------------------------------------------|-------------------------------------------------------|-----------------------------|--------------------------------------|-----------|
| Pt <sub>23</sub> Ni <sub>77</sub>            | 0.5 M H <sub>2</sub> SO <sub>4</sub> + 0.5 M Methanol | 0.60                        | 2470                                 | This work |
| CeO <sub>x</sub> /PtCu/CeCuO <sub>x</sub> /C | 0.5 M H <sub>2</sub> SO <sub>4</sub> + 0.5 M Methanol | 0.52                        | 889                                  | 28        |
| Ce-modified Pt NPs/C                         | 0.5 M H <sub>2</sub> SO <sub>4</sub> + 1.0 M Methanol | 0.55                        | 1470                                 | 29        |
| CuWPt-1                                      | 0.1 M HClO <sub>4</sub> + 1.0 M Methanol              | 0.60                        | 2110                                 | 30        |
| GDY@PtCu                                     | 0.5 M H <sub>2</sub> SO <sub>4</sub> + 1.0 M Methanol | 0.64                        | 700                                  | 31        |
| Ru-ca-PtNi                                   | 0.1 M HClO <sub>4</sub> + 0.5 M Methanol              | 0.60                        | 2010                                 | 32        |
| Pt <sub>3</sub> Co–CoP <sub>2</sub>          | 0.1 M HClO <sub>4</sub> + 1.0 M Methanol              | 0.59                        | 1400                                 | 33        |
| Pt/CeO <sub>2</sub> -P                       | 0.5 M H <sub>2</sub> SO <sub>4</sub> + 1.0 M Methanol | 0.60                        | 714                                  | 34        |
| PtCo @NC                                     | 0.1 M HClO <sub>4</sub> + 1.0 M Methanol              | 0.45                        | 2300                                 | 35        |
| PtTe PNCs                                    | 0.5 M H <sub>2</sub> SO <sub>4</sub> + 1.0 M Methanol | 0.54                        | 1020                                 | 36        |

## References

- [1] S. Fang, X. Zhu, X. Liu, J. Gu, W. Liu, D. Wang, W. Zhang, Y. Lin, J. Lu, S. Wei, Y. Li and T. Yao, *Nat Commun*, 2020, **11**, 1029.
- [2] D. Li, X. Chen, Y. Lv, G. Zhang, Y. Huang, W. Liu, Y. Li, R. Chen, C. Nuckolls and H. Ni, *Appl. Catal. B*, 2020, **269**, 118824.
- [3] P. Wang, K. Jiang, G. Wang, J. Yao and X. Huang, *Angew. Chem. Int. Ed*, 2016, **55**, 12859-12863.
- [4] P. Wang, X. Zhang, J. Zhang, S. Wan, S. Guo, G. Lu, J. Yao and X. Huang, *Nat Commun*, 2017, **8**, 14580.
- [5] L. Zhang, Y. Jia, H. Liu, L. Zhuang, X. Yan, C. Lang, X. Wang, D. Yang, K. Huang, S. Feng and X. Yao, *Angew. Chem. Int. Ed*, 2019, **58**, 9404-9408.
- [6] Z. Zhao, H. Liu, W. Gao, W. Xue, Z. Liu, J. Huang, X. Pan and Y. Huang, *J Am Chem Soc*, 2018, **140**, 9046-9050.
- [7] J. Fan, J. Wu, X. Cui, L. Gu, Q. Zhang, F. Meng, B. H. Lei, D. J. Singh and W. Zheng, *J Am Chem Soc*, 2020, **142**, 3645-3651.
- [8] M. Wang, Y. Xu, C.-K. Peng, S.-Y. Chen, Y.-G. Lin, Z. Hu, L. Sun, S. Ding, C.-W. Pao, Q. Shao and X. Huang, *J. Am. Chem. Soc*, 2021, **143**, 16512-16518.
- [9] K. Jiang, B. Liu, M. Luo, S. Ning, M. Peng, Y. Zhao, Y. R. Lu, T. S. Chan, F. M. F. de Groot and Y. Tan, *Nat Commun*, 2019, **10**, 1743.
- [10] Z. Xing, C. Han, D. Wang, Q. Li and X. Yang, *ACS Catalysis*, 2017, **7**, 7131-7135.
- [11] M. Liu, Y. Xu, S. Liu, S. Yin, M. Liu, Z. Wang, X. Li, L. Wang and H. Wang, *J. Mater. Chem. A*, 2021, **9**, 5026-5032.
- [12] M. Li, H. Wang, W. Zhu, W. Li, C. Wang and X. Lu, *Adv Sci (Weinh)*, 2020, **7**, 1901833.
- [13] X. Qin, L. Zhang, G.-L. Xu, S. Zhu, Q. Wang, M. Gu, X. Zhang, C. Sun, P. B. Balbuena, K. Amine and M. Shao, *ACS Catalysis*, 2019, **9**, 9614-9621.
- [14] Z. Liu, J. Qi, M. Liu, S. Zhang, Q. Fan, H. Liu, K. Liu, H. Zheng, Y. Yin and C. Gao, *Angew. Chem. Int. Ed*, 2018, **57**, 11678-11682.

- [15] H. Tan, B. Tang, Y. Lu, Q. Ji, L. Lv, H. Duan, N. Li, Y. Wang, S. Feng, Z. Li, C. Wang, F. Hu, Z. Sun and W. Yan, *Nat Commun*, 2022, **13**, 2024.
- [16] W. Zhao, C. Luo, Y. Lin, G.-B. Wang, H. M. Chen, P. Kuang and J. Yu, *ACS Catalysis*, 2022, **12**, 5540-5548.
- [17] Y. Shi, Z. R. Ma, Y. Y. Xiao, Y. C. Yin, W. M. Huang, Z. C. Huang, Y. Z. Zheng, F. Y. Mu, R. Huang, G. Y. Shi, Y. Y. Sun, X. H. Xia and W. Chen, *Nat Commun*, 2021, **12**, 3021.
- [18] F. Y. Yu, Z. L. Lang, L. Y. Yin, K. Feng, Y. J. Xia, H. Q. Tan, H. T. Zhu, J. Zhong, Z. H. Kang and Y. G. Li, *Nat Commun*, 2020, **11**, 490.
- [19] D. Liu, X. Li, S. Chen, H. Yan, C. Wang, C. Wu, Y. A. Haleem, S. Duan, J. Lu, B. Ge, P. M. Ajayan, Y. Luo, J. Jiang and L. Song, *Nature Energy*, 2019, **4**, 512-518.
- [20] X. Cheng, Y. Lu, L. Zheng, Y. Cui, M. Niibe, T. Tokushima, H. Li, Y. Zhang, G. Chen, S. Sun and J. Zhang, *Nano Energy*, 2020, **73**, 104739.
- [21] X. Li, Y. Fang, J. Wang, H. Fang, S. Xi, X. Zhao, D. Xu, H. Xu, W. Yu, X. Hai, C. Chen, C. Yao, H. B. Tao, A. G. R. Howe, S. J. Pennycook, B. Liu, J. Lu and C. Su, *Nat Commun*, 2021, **12**, 2351.
- [22] K. Li, Y. Li, Y. Wang, J. Ge, C. Liu and W. Xing, *Energy Environ. Sci*, 2018, **11**, 1232-1239.
- [23] L. Zhu, H. Lin, Y. Li, F. Liao, Y. Lifshitz, M. Sheng, S. T. Lee and M. Shao, *Nat Commun*, 2016, **7**, 12272.
- [24] J. Ying, G. Jiang, Z. Paul Cano, L. Han, X.-Y. Yang and Z. Chen, *Nano Energy*, 2017, **40**, 88-94.
- [25] P. Bhanja, B. Mohanty, A. K. Patra, S. Ghosh, B. K. Jena and A. Bhaumik, *ChemCatChem*, 2018, **11**, 583-592.
- [26] N. Cheng, S. Stambula, D. Wang, M. N. Banis, J. Liu, A. Riese, B. Xiao, R. Li, T. K. Sham, L. M. Liu, G. A. Botton and X. Sun, *Nat Commun*, 2016, **7**, 13638.
- [27] Z. Pu, T. Liu, G. Zhang, Z. Chen, D. S. Li, N. Chen, W. Chen, Z. Chen and S. Sun, *Adv. Energy Mater*, 2022, **12**, 2200293.
- [28] Y. Wang, Z. Li, X. Zheng, R. Wu, J. Song, Y. Chen, X. Cao, Y. Wang and Y.

- Nie, *Appl. Catal. B*, 2023, **325**, 122383.
- [29] L. Chen, X. Liang, X. Li, J. Pei, H. Lin, D. Jia, W. Chen, D. Wang and Y. Li, *Nano Energy*, 2020, **73**, 104784.
- [30] D. Liu, Q. Zeng, C. Hu, D. Chen, H. Liu, Y. Han, L. Xu, Q. Zhang and J. Yang, *Nano Research Energy*, 2022, **1**.
- [31] H. Pan, Z. Jiang, Z. Zuo, F. He, F. Wang, L. Li, Q. Chang, B. Guan and Y. Li, *Nano Today*, 2021, **39**, 101213.
- [32] F. Kong, X. Liu, Y. Song, Z. Qian, J. Li, L. Zhang, G. Yin, J. Wang, D. Su and X. Sun, *Angew. Chem. Int. Ed*, 2022, **61**, 202207524.
- [33] N. Yang, D. Chen, P. Cui, T. Lu, H. Liu, C. Hu, L. Xu and J. Yang, *SmartMat*, 2021, **2**, 234-245.
- [34] L. Tao, Y. Shi, Y.-C. Huang, R. Chen, Y. Zhang, J. Huo, Y. Zou, G. Yu, J. Luo, C.-L. Dong and S. Wang, *Nano Energy*, 2018, **53**, 604-612.
- [35] G. Hu, L. Shang, T. Sheng, Y. Chen and L. Wang, *Adv. Funct. Mater*, 2020, **30**, 2002281.
- [36] Q. Zhang, T. Xia, H. Huang, J. Liu, M. Zhu, H. Yu, W. Xu, Y. Huo, C. He, S. Shen, C. Lu, R. Wang and S. Wang, *Nano Research Energy*, 2023, **2**, 9120041.
